# Supplementary material
Source: PubMed Central journal article supplement (PMC6648228)
Supplement: ao8b02799_si_001.pdf [file ao8b02799_si_001.pdf]

## **Supporting Information (SI)**

**for**

### **Scalable Synthesis of Collagenic-Waste and Natural Rubber-Based Biocomposite for Removals of Hg(II) and Dyes: Approach for Cost-Friendly Waste Management**

Nayan Ranjan Singha,<sup>\*,a</sup> Chandan Roy,<sup>a,b</sup> Manas Mahapatra,<sup>a</sup> Arnab Dutta,<sup>a</sup> Joy Sankar Deb Roy,<sup>a</sup> Madhushree Mitra,<sup>b</sup> and Pijush Kanti Chattopadhyay<sup>\*,b</sup>

<sup>a</sup>Advanced Polymer Laboratory, Department of Polymer Science and Technology and

<sup>b</sup>Department of Leather Technology, Government College of Engineering and Leather Technology (Post Graduate), Maulana Abul Kalam Azad University of Technology, Salt Lake, Kolkata-700106, West Bengal, India.

#### **Corresponding Author**

\*E-mail: drs.nrs@gmail.com (N.R.S.)

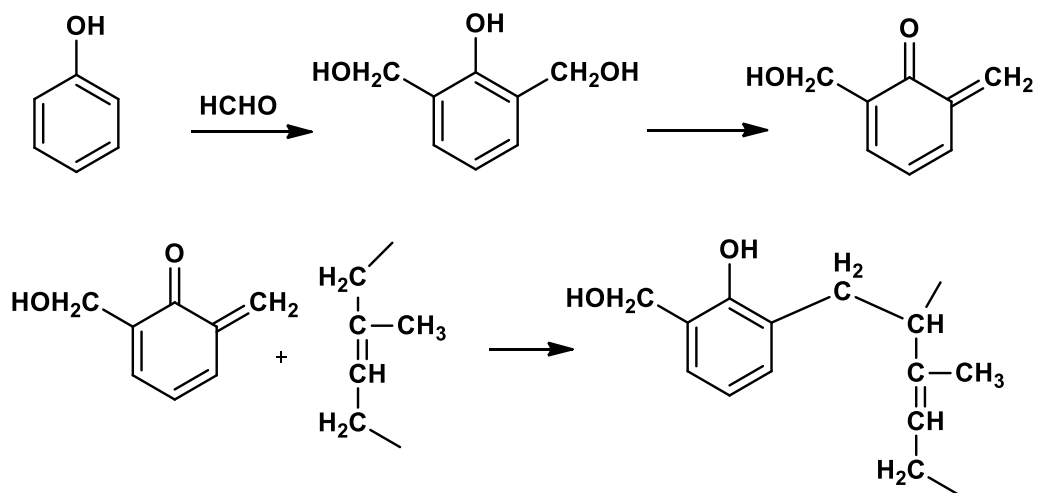

**Scheme S1.** Allyl hydrogen mechanism proposed by van der Meer

**Table S1** Relative intensities of NR and NRCBD

| assignment         | NR             |                |                |                |                | remarks                                                                                                                                                                                  |
|--------------------|----------------|----------------|----------------|----------------|----------------|------------------------------------------------------------------------------------------------------------------------------------------------------------------------------------------|
|                    | C <sub>α</sub> | C <sub>β</sub> | C <sub>γ</sub> | C <sub>δ</sub> | C <sub>ε</sub> |                                                                                                                                                                                          |
| δ (ppm)            | 135.16         | 124.99         | 32.17          | 26.36          | 23.37          | pure NR, devoid of pendent double bond and having the equal proportion of each fragment                                                                                                  |
| relative intensity | 0.17           | 0.20           | 0.23           | 0.22           | 0.17           |                                                                                                                                                                                          |
| NRCBD              |                |                |                |                |                |                                                                                                                                                                                          |
| δ (ppm)            | 135.13         | 125.75         | 32.68          | 26.78          | 23.94          | significantly reduced intensity in C <sub>α</sub> and C <sub>β</sub> of NR in NRCBD confirmed reaction between >C=C< of NR and phenolic component of CBD during high temperature curing. |
| relative intensity | 0.05           | 0.06           | 0.20           | 0.27           | 0.41           |                                                                                                                                                                                          |

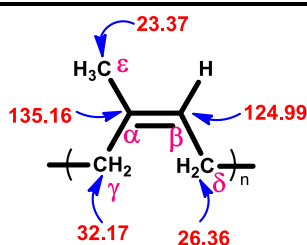

**Table S2.** FTIR analyses for NR, CBD, NRCBD, SF-, BCB-, and Hg(II)-NRCBD

| FTIR peaks (cm <sup>-1</sup> ) |                  |                  |               |                 |                         | significance(s)                                                                                                                                     |
|--------------------------------|------------------|------------------|---------------|-----------------|-------------------------|-----------------------------------------------------------------------------------------------------------------------------------------------------|
| NR                             | CBD              | NRCBD            | SF-NRCBD      | BCB-NRCBD       | Hg(II)-NRCBD            |                                                                                                                                                     |
| -                              | -                | -                | -             | -               | 3910, 3789              | O-H <i>str.</i>                                                                                                                                     |
| -                              | -                | -                | -             | -               | 3846                    | O-H <i>str.</i> of HHg (OH) deposits                                                                                                                |
| -                              | -                | -                | -             | -               | 3827 (w)                | O-H <i>str.</i> of Hg(OH) <sub>2</sub> deposits formed at pH > 5.0 during adsorption                                                                |
| -                              | 3405 (b, vs)     | 3399 (b, s)      | 3399 (b, m)   | 3429 (b, m)     | 3433, 3409, 3399 (b, m) | N-H/O-H mutual H-bonding, new peaks at 3409 and 3433 in Hg(II)-NRCBD was due to binding of Hg(II) with N-H                                          |
| 3283 (b, w)                    | -                | -                | -             | -               | -                       | N-H/C-H mutual H-bonding (protein impurities in NR) <sup>51</sup>                                                                                   |
| -                              | 3088 (sh)        | 3088 (sh)        | 3078 (sh)     | 3066 (sh, vw)   | 3083 (vw)               | aromatic ring C-H                                                                                                                                   |
| 3036                           | -                | 3040 (w)         | 3043 (sh, vw) | 3041 (w)        | 3042 (vw)               | C=C-H of NR <sup>30</sup>                                                                                                                           |
| 2959 (w)                       | 2957(vw)         | 2962(w)          | 2962 (w)      | 2962 (w)        | 2961 (sh)               | <i>asym. str.</i> -CH <sub>3</sub> <sup>30</sup>                                                                                                    |
| 2928                           | 2927             | 2927             | 2928          | 2923            | 2927                    | <i>sym. str.</i> -CH <sub>3</sub> <sup>30</sup>                                                                                                     |
| 2915                           | -                | -                | -             | -               | -                       | <i>sym. str.</i> of -CH <sub>3</sub> / >CH <sub>2</sub> adjacent to C=C splits into two in NR (i.e., 2928 and 2912)                                 |
| 2851                           | 2854             | 2854             | 2855          | 2853            | 2856                    | <i>sym. str.</i> of -CH <sub>2</sub>                                                                                                                |
| 2725                           | -                | 2727             | 2728          | 2727            | -                       | <i>def. asym.</i> -CH <sub>3</sub> overtone <sup>30</sup>                                                                                           |
| -                              | 2117 (br, w)     | 2107 (br, w)     | 2120 (br, w)  | 2096 (br, vw)   | -                       | >NH <sup>+</sup> -, >C=NH <sup>+</sup> - and >NH <sub>2</sub> <sup>+</sup> ; vanished in Hg(II)-NRCBD due to Hg/N interaction                       |
| 1748-1738                      | -                | -                | -             | -               | -                       | $\nu$ R1-(C=O)-O-R2 (Lipids) <sup>30</sup>                                                                                                          |
| 1711                           | -                | -                | -             | -               | -                       | $\nu$ R1-(C=O)-OH (Lipids) <sup>30</sup>                                                                                                            |
| 1663, 1657, 1630               | 1660, 1649, 1635 | 1660, 1647, 1635 | 1661, 1646    | 1660 (vw), 1647 | 1659 (vw), 1646         | secondary amide I / C=C <i>str.</i>                                                                                                                 |
| 1541                           | 1548             | 1546             | 1551          | 1545            | 1546                    | <i>asym.</i> -COO <sup>-</sup> /Amide II : $\beta$ N-H + $\nu$ C-N) <sup>30</sup>                                                                   |
| 1446                           | 1452             | 1450             | 1451          | 1449            | 1451                    | -CH <sub>2</sub> - scissoring <sup>35</sup>                                                                                                         |
| -                              | 1408             | 1406 (sh)        | 1406 (vw)     | 1402 (w)        | -                       | <i>sym.</i> -COO <sup>-</sup>                                                                                                                       |
| 1377, 1361                     | 1385 (vw)        | 1376             | 1377          | 1376            | 1382, 1378              | <i>asym.</i> -CH <sub>3</sub>                                                                                                                       |
| -                              | 1334             | 1332             | 1334          | 1333 (vw)       | -                       | amide-III; vanished in Hg(II)-NRCBD due to binding of Hg(II) with N-H                                                                               |
| -                              | 1318 (sh)        | 1317             | 1318 (vw)     | 1316 (vw)       | 1318 (b, vw)            | $\nu$ C(4)-C(5) + $\nu$ C(3)-C(4) + $\nu$ C(1)-C(6) of chromane <sup>31</sup>                                                                       |
| 1310                           | -                | -                | -             | -               | -                       | $\delta$ <i>asym.</i> -CH <sub>3</sub> <sup>30</sup>                                                                                                |
| 1288                           | -                | -                | -             | -               | -                       | $\beta$ C=C-H of NR; consumption of C=C of NR in NR-CBDs <i>via</i> chromane formation <sup>30</sup>                                                |
| 1246                           | 1239             | 1239 (b,w)       | 1240          | 1238            | 1240                    | $\nu$ C(9)-O(2) + $\rho$ C(10)H <sub>2</sub> of chromane <sup>31</sup> /sulfonic acid salts                                                         |
| -                              | 1201             | 1195 (w)         | 1201          | 1196            | 1197                    | sulfonic acid salts                                                                                                                                 |
| -                              | 1158             | 1156 (b,w)       | 1161          | 1155 (b, vw)    | 1156                    | $\delta$ C(3)-H + $\delta$ C(2)-H of chromane <sup>31</sup> / glycoside                                                                             |
| 1128                           | 1119             | 1126             | 1124 (vw)     | 1124            | 1124                    | $\rho$ C(13)H <sub>3</sub> + $\tau\omega$ C(10)H <sub>2</sub> of chromane <sup>31</sup> / $\nu$ C-C + $\omega$ -CH <sub>2</sub> of NR <sup>30</sup> |
| 1090                           | -                | 1097             | 1096          | 1098            | 1100 (vw)               | $\tau$ -CH <sub>2</sub> of NR <sup>30</sup>                                                                                                         |
| 1009                           | -                | -                | -             | -               | -                       | $\nu$ C-C <sup>30</sup>                                                                                                                             |
| 984                            | -                | -                | -             | -               | -                       | $\tau$ C=C peak of NR; consumption of C=C of NR in NR-CBDs <i>via</i> chromane formation <sup>30</sup>                                              |
| 930                            | 922 (vw)         | 926 (vw)         | -             | -               | -                       | $\nu$ C-C <sup>30</sup>                                                                                                                             |
| 840                            | -                | 837(vs)          | 837           | 838             | 840 (sh)                | $\gamma$ C=C-H (cis-1,4 addition) of NR <sup>30</sup>                                                                                               |
| -                              | 805              | -                | -             | -               | -                       | triazine ring of melamine                                                                                                                           |
| -                              | 780              | 780              | 780           | -               | 781 (vw)                | oxolated Cr-complex                                                                                                                                 |
| 741                            | -                | -                | -             | -               | -                       | $\rho$ -CH <sub>2</sub> <sup>-30</sup>                                                                                                              |
| -                              | 670              | 659              | 659 (vvw)     | 657 (vw)        | 658                     | sulfonic acid salts                                                                                                                                 |
| -                              | 603              | 600              | -             | -               | 600                     | $\delta$ C=O + $\delta$ C(3)-H of chromane <sup>31</sup> /sulfones                                                                                  |
| 567                            | -                | 572 (b)          | 563           | 573             | -                       | $\delta$ C(5)C(11)C(10) + $\delta$ C(1)C(6)C(5) + $\delta$ C(2)C(3)C(4) of chromane <sup>31</sup>                                                   |
| 490                            | -                | -                | -             | -               | -                       | $\beta$ C-C-C <sup>30</sup>                                                                                                                         |

b = broad;  $\nu$ : stretching,  $\delta$ : in-plane deformation,  $\gamma$ : out-of-plane deformation,  $\rho$ : rocking,  $\omega$ : wagging,  $\tau\omega$ : twisting,  $\tau$ : torsion modes

**Table S3.** XPS analyses for NRCBD, Hg(II)-, BCB-, and SF-NRCBD

| orbital                                                                           | NRCBD  | Hg(II)-<br>NRCBD | BCB-<br>NRCBD | SF-<br>NRCBD | assignment                                                                                             |
|-----------------------------------------------------------------------------------|--------|------------------|---------------|--------------|--------------------------------------------------------------------------------------------------------|
| <b>C1s</b>                                                                        | 284.87 | 284.97           | 284.89        | 284.90       | –CH <sub>2</sub> –/–CH <sub>3</sub> of chromane,<br>phenol                                             |
|                                                                                   | 285.33 | 285.50           | 285.42        | 285.58       | tertiary C–H                                                                                           |
|                                                                                   | 285.75 | 285.91           | 285.91        | 286.13       | C1 of phenol                                                                                           |
|                                                                                   | 286.15 | 286.26           | 286.34        | 286.74       | C <sub>α</sub> of amino acid                                                                           |
|                                                                                   | 286.50 | 286.71           | 286.75        | 287.18       | C2 of chromane ring and ether                                                                          |
|                                                                                   | 286.87 | 287.15           | 287.04        | 287.39       | >C=N of melamine/<br>–CONH <sub>2</sub> /–CONH–/–COOH                                                  |
| <b>O1s</b>                                                                        | 530.20 | 531.18           | 530.81        | 530.60       | polysaccharides or GAGs                                                                                |
|                                                                                   | 531.02 | 531.61           | 531.76        | 531.49       | Cr(OH) <sub>3</sub>                                                                                    |
|                                                                                   | 532.06 | 532.25           | 532.00        | 532.29       | >C=O                                                                                                   |
|                                                                                   | 532.82 | 532.83           | 532.62        | 532.94       | chromane/ether/–COO <sup>–</sup>                                                                       |
|                                                                                   | 533.67 | 533.78           | 533.67        | 533.72       | O–H                                                                                                    |
| <b>N1s</b>                                                                        | 398.05 | 398.83           | –             | –            | pyrrolidine units of proline/<br>hydroxyproline; coordinate<br>bonding with Hg(II) in Hg(II)-<br>NRCBD |
|                                                                                   | 399.67 | 403.95           | –             | –            | –NH–/–NH <sub>2</sub> /C–N of collagen;<br>coordinate bonding with<br>Hg(II)                           |
| <b>Hg 4f<sub>7/2</sub></b> (102.58 eV)<br>and <b>4f<sub>5/2</sub></b> (106.68 eV) |        | 100.93           |               |              | coordinate bonding                                                                                     |
|                                                                                   |        | 104.63           |               |              | coordinate bonding                                                                                     |

**Table S3 (Continued)**

|                              | polysaccharides/GAGs<br>/ZnO | Cr(OH) <sub>3</sub> /<br>Zn(OH) <sub>2</sub> | >C=O   | chromane/ether/<br>-COO <sup>-</sup> | O-H               |
|------------------------------|------------------------------|----------------------------------------------|--------|--------------------------------------|-------------------|
| <b>O1s of NRCBD (eV)</b>     | 530.20                       | 531.02                                       | 532.06 | 532.82                               | 533.67            |
| relative intensities (%)     | 0.01                         | 0.26                                         | 0.29   | 0.21                                 | 0.22              |
| <b>O1s of Hg-NRCBD (eV)</b>  | 531.18                       | 531.61                                       | 532.25 | 532.83                               | 533.78            |
| relative intensities         | 0.14                         | 0.07                                         | 0.14   | 0.34                                 | 0.30 <sup>@</sup> |
| <b>O1s of BCB-NRCBD (eV)</b> | 530.81                       | 531.76                                       | 532.00 | 532.62                               | 533.67            |
| relative intensities         | 0.11 <sup>#</sup>            | 0.42 <sup>#</sup>                            | 0.02   | 0.34                                 | 0.10              |
| <b>O1s of SF-NRCBD (eV)</b>  | 530.60                       | 531.49                                       | 532.29 | 532.94                               | 533.72            |
| relative intensities         | 0.04                         | 0.23                                         | 0.31   | 0.25                                 | 0.17              |

<sup>@</sup> deposited Hg(OH)<sub>2</sub> on Hg-NRCBD

<sup>#</sup> deposited ZnO and Zn(OH)<sub>2</sub> on BCB-NRCBD

**Table S3 (Continued)**

|                              | CH <sub>2</sub> / CH <sub>3</sub> of<br>chromane,<br>phenol | tertiary<br>CH | phenol | C <sub>α</sub> | C2 of<br>chromane<br>ring, ether | >C=N of melamine/<br>CONH <sub>2</sub> / CONH-/ COOH |
|------------------------------|-------------------------------------------------------------|----------------|--------|----------------|----------------------------------|------------------------------------------------------|
| <b>C1s of NRCBD (eV)</b>     | 284.87                                                      | 285.33         | 285.75 | 286.15         | 286.50                           | 286.87                                               |
| relative intensities         | 0.023                                                       | 0.28           | 0.245  | 0.108          | 0.205                            | 0.139                                                |
| <b>C1s of Hg-NRCBD (eV)</b>  | 284.97                                                      | 285.5          | 285.91 | 286.26         | 286.71                           | 287.15                                               |
| relative intensities         | 0.083                                                       | 0.195          | 0.154  | 0.158          | 0.121                            | 0.288                                                |
| <b>C1s of BCB-NRCBD (eV)</b> | 284.89                                                      | 285.42         | 285.91 | 286.34         | 286.75                           | 287.04                                               |
| relative intensities         | 0.039                                                       | 0.156          | 0.286  | 0.327          | 0.171                            | 0.021                                                |
| <b>C1s of SF-NRCBD (eV)</b>  | 284.9                                                       | 285.58         | 286.13 | 286.73         | 287.18                           | 287.39                                               |
| relative intensities         | 0.097                                                       | 0.115          | 0.164  | 0.204          | 0.255                            | 0.165                                                |

**Table S4** Design of experiment of CCD for SF/BCB

| <b>run no.</b> | <b>concentration of dyes (mg L<sup>-1</sup>, A)</b> | <b>temperature (°C, B)</b> | <b>pH<sub>i</sub> for SF/BCB (-, C)</b> | <b>actual ACs of SF/BCB (mg<sup>-1</sup> g)</b> | <b>predicted ACs of SF/BCB (mg<sup>-1</sup> g)</b> |
|----------------|-----------------------------------------------------|----------------------------|-----------------------------------------|-------------------------------------------------|----------------------------------------------------|
| 1              | 10.00                                               | 30.00                      | 8.00/7.00                               | 05.02/06.42                                     | 03.55/05.02                                        |
| 2              | 40.00                                               | 30.00                      | 8.00/7.00                               | 44.21/30.21                                     | 45.04/28.69                                        |
| 3              | 10.00                                               | 50.00                      | 8.00/7.00                               | 20.76/14.76                                     | 20.35/14.59                                        |
| 4              | 40.00                                               | 50.00                      | 8.00/7.00                               | 56.76/34.76                                     | 58.03/33.14                                        |
| 5              | 10.00                                               | 30.00                      | 12.00/11.00                             | 13.53/19.53                                     | 12.69/20.91                                        |
| 6              | 40.00                                               | 30.00                      | 12.00/11.00                             | 42.40/30.40                                     | 43.25/30.33                                        |
| 7              | 10.00                                               | 50.00                      | 12.00/11.00                             | 24.54/17.54                                     | 24.14/18.82                                        |
| 8              | 40.00                                               | 50.00                      | 12.00/11.00                             | 48.98/21.98                                     | 50.88/23.14                                        |
| 9              | 1.00                                                | 40.00                      | 10.00/9.00                              | 02.47/02.47                                     | 04.69/01.64                                        |
| 10             | 50.24                                               | 40.00                      | 10.00/9.00                              | 60.75/18.75                                     | 58.13/19.84                                        |
| 11             | 25.00                                               | 23.18                      | 10.00/9.00                              | 36.18/30.18                                     | 36.76/31.02                                        |
| 12             | 25.00                                               | 56.82                      | 10.00/9.00                              | 58.51/33.51                                     | 57.31/33.01                                        |
| 13             | 25.00                                               | 40.00                      | 6.64/5.64                               | 23.48/26.48                                     | 23.52/29.17                                        |
| 14             | 25.00                                               | 40.00                      | 13.00/12.36                             | 32.46/36.46                                     | 31.64/34.11                                        |
| 15             | 25.00                                               | 40.00                      | 10.00/9.00                              | 56.25/58.20                                     | 56.26/58.20                                        |
| 16             | 25.00                                               | 40.00                      | 10.00/9.00                              | 56.25/58.20                                     | 56.26/58.20                                        |
| 17             | 25.00                                               | 40.00                      | 10.00/9.00                              | 56.25/58.20                                     | 56.26/58.20                                        |
| 18             | 25.00                                               | 40.00                      | 10.00/9.00                              | 56.25/58.20                                     | 56.26/58.20                                        |
| 19             | 25.00                                               | 40.00                      | 10.00/9.00                              | 56.25/58.20                                     | 56.26/58.20                                        |
| 20             | 25.00                                               | 40.00                      | 10.00/9.00                              | 56.25/58.20                                     | 56.26/58.20                                        |

**Table S5.** Comparison table

| name of adsorbate                                      | name of adsorbent                                           | adsorption capacities (mg g <sup>-1</sup> ) /pH/C <sub>0</sub> (mg L <sup>-1</sup> )/temperature (K) | ref.                        |                       |
|--------------------------------------------------------|-------------------------------------------------------------|------------------------------------------------------------------------------------------------------|-----------------------------|-----------------------|
| BCB <sup>a</sup>                                       | dimethyl terephthalate distillation residue                 | 13.00/-/500/298                                                                                      | S2                          |                       |
|                                                        | natural clay                                                | 42.00/-/50-500/-                                                                                     | S3                          |                       |
|                                                        | CPCMC <sup>a</sup>                                          | 82.22/6.9/10-140/303                                                                                 | S4                          |                       |
|                                                        | SPACMC <sup>b</sup>                                         | 83.73/6.3/10-140/303                                                                                 | S4                          |                       |
|                                                        | PAACMC <sup>c</sup>                                         | 86.85/6.9/10-140/303                                                                                 | S4                          |                       |
|                                                        | sulfonated Phenol-Formaldehyde resin                        | 108.00/-/50-500/298                                                                                  | S5                          |                       |
|                                                        | SDS- $\gamma$ -Fe <sub>2</sub> O <sub>3</sub> <sup>d</sup>  | 166.70/6.0/1-400/298                                                                                 | S6                          |                       |
|                                                        | NIPAm- <i>co</i> -IA <sup>e</sup>                           | 209.20/-/50-500/298                                                                                  | S7                          |                       |
|                                                        | AAM-IA-MMT <sup>f</sup> hydrogel nanocomposite              | 457.40/6.0/500/298                                                                                   | S8                          |                       |
|                                                        | AAM-AMPSNa <sup>g</sup> hydrogel                            | 492.20/-/500/298                                                                                     | S9                          |                       |
|                                                        | <b>NRCBD<sup>h</sup></b>                                    | <b>46.14/9.0/5-40/303</b>                                                                            | <b>TS<sup>^</sup></b>       |                       |
| SF                                                     | AC <sup>i</sup>                                             | 1.32/5.0/25/298                                                                                      | S10                         |                       |
|                                                        | hydrogels prepared with sodium polyacrylate and 6 wt% of CM | 9.45/-/10/-                                                                                          | S4                          |                       |
|                                                        | CO <sub>2</sub> neutralized activated red mud               | 9.77/8.3/37/302                                                                                      | S11                         |                       |
|                                                        | native SBP <sup>j</sup>                                     | 17.90/10.0/100/293                                                                                   | S12                         |                       |
|                                                        | AC <sup>i</sup>                                             | 19.01/6.0/10/-                                                                                       | S13                         |                       |
|                                                        | pinapple peels                                              | 21.70/6.0/60/302                                                                                     | S14                         |                       |
|                                                        | Cu-NWs-AC <sup>k</sup>                                      | 34.00/5.5/15/-                                                                                       | S15                         |                       |
|                                                        | NaOH-treated rice husk                                      | 37.97/8.0/10/303                                                                                     | S16                         |                       |
|                                                        | MWCNT <sup>l</sup>                                          | 43.42/1.0/25/298                                                                                     | S10                         |                       |
|                                                        | NiS-NP-AC <sup>m</sup>                                      | 46.00-52.00/8.1/5/-                                                                                  | S17                         |                       |
|                                                        | Au-NP-AC <sup>n</sup>                                       | 50.25/7.0/18/-                                                                                       | S18                         |                       |
|                                                        | CuO-NPs <sup>o</sup>                                        | 53.67/12.0/154/303                                                                                   | S19                         |                       |
|                                                        | PDA@SBP <sup>p</sup>                                        | 54.00/10.0/100/293                                                                                   | S12                         |                       |
|                                                        | HDTMA <sup>q</sup> -modified Spirulina sp.                  | 54.05/2.0/300/-                                                                                      | S20                         |                       |
|                                                        | ZnO-NR-AC <sup>r</sup>                                      | 55.25/6.0/10/-                                                                                       | S13                         |                       |
|                                                        | MIL-101(Cr)-SO <sub>3</sub> H                               | 70.80/6.2/50/-                                                                                       | S21                         |                       |
|                                                        | Al-Mont-EnPILC <sup>s</sup>                                 | 76.13/10.0/100/295                                                                                   | S22                         |                       |
|                                                        | Cd(OH) <sub>2</sub> -NW-AC <sup>t</sup>                     | 76.92/5.0/25/298                                                                                     | S10                         |                       |
|                                                        | SDS/RM <sup>u</sup>                                         | 89.40/4.0/50/308                                                                                     | S23                         |                       |
|                                                        | PANIPN21 <sup>v</sup>                                       | 117.60/9.0/30/303                                                                                    | S24                         |                       |
|                                                        | PANIPN41 <sup>w</sup>                                       | 127.61/9.0/30/303                                                                                    | S24                         |                       |
|                                                        | MDMLG <sup>x</sup>                                          | 137.53/12.0/105/-                                                                                    | S25                         |                       |
|                                                        |                                                             | <b>NRCBD<sup>h</sup></b>                                                                             | <b>303.61/10.0/5-40/303</b> | <b>TS<sup>^</sup></b> |
|                                                        | Hg(II)                                                      | starch- <i>g</i> -poly(acrylamide)                                                                   | 7.30/0.5-1.0/-/293          | S26                   |
|                                                        |                                                             | chitosan derivative adsorbent                                                                        | 9.02/3.0/60/298             | S27                   |
|                                                        |                                                             | EDA-modified mPMMA microbeads <sup>y</sup>                                                           | 9.08/5.0/5-700/298          | S28                   |
|                                                        |                                                             | RGO <sup>z</sup> -MnO <sub>2</sub>                                                                   | 9.50/-/1/303                | S29                   |
| RGO <sup>z</sup> -Ag                                   |                                                             | 9.53/-/1/303                                                                                         | S29                         |                       |
| APT <sup>aa</sup>                                      |                                                             | 13.20/5.0/3800/303                                                                                   | S30                         |                       |
| <i>Hardwickia binata</i> bark                          |                                                             | 13.50/6.0/400/298                                                                                    | S31                         |                       |
| natural chitosan spheres                               |                                                             | 13.50±0.40/6.0/38-375/298                                                                            | S32                         |                       |
| mesoporous silica-coated magnetic particles            |                                                             | 14.00/2.0/10-60/-                                                                                    | S33                         |                       |
| poly(AAm- <i>co</i> -AAc) <sup>ab</sup>                |                                                             | 15.50/2.5/100/288                                                                                    | S34                         |                       |
| Ti(IV) <sup>ac</sup>                                   |                                                             | 17.20/6.0/20/293-323                                                                                 | S35                         |                       |
| poly(HEMA <sup>ad</sup> /chitosan) composite membranes |                                                             | 18.41±0.54/2.0-6.0/30-400/293                                                                        | S36                         |                       |
| SMs <sup>ae</sup>                                      |                                                             | 20.00/7.5/100-900/303                                                                                | S37                         |                       |
| GMA-MMA-DVB <sup>af</sup>                              |                                                             | 20.06/7.0/15/298                                                                                     | S38                         |                       |
| chemically treated sawdust ( <i>Acacia arabica</i> )   |                                                             | 20.62/6.0/3/-                                                                                        | S39                         |                       |
| multifunctional mesoporous material                    |                                                             | 21.05/-/1000/-                                                                                       | S40                         |                       |
| CTS-PVA <sup>ag</sup>                                  |                                                             | 24.98/5.5/50/303                                                                                     | S41                         |                       |
| Ca-alginate beads                                      |                                                             | 28.90±0.70/6.0/200/298                                                                               | S42                         |                       |
| poly(MMA-MAGA) <sup>ah</sup>                           |                                                             | 29.90/2.0-6.0/100/293                                                                                | S42                         |                       |
| epichlorohydrin-crosslinked chitosan membranes         |                                                             | 30.30/6.0/38-375/298                                                                                 | S44                         |                       |
| glutaraldehyde-crosslinked chitosan spheres            |                                                             | 31.10±0.30/6.0/38-375/298                                                                            | S32                         |                       |
| BTESPT-SMs <sup>ai</sup>                               |                                                             | 37.00/7.5/100-900/303                                                                                | S36                         |                       |



|                                                                                   |                            |                       |
|-----------------------------------------------------------------------------------|----------------------------|-----------------------|
| phosphoric acid-treated poly(glycidylmethacrylate-<br><i>co</i> -divinyl benzene) | 40.00/–/100/300            | S45                   |
| GGAMSAASP18 <sup>aj</sup>                                                         | 40.95/7.0/5–30/303         | S46                   |
| GGAMSAASP14 <sup>ak</sup>                                                         | 49.12/7.0/5–30/303         | S46                   |
| cellulose-lysine-schiff bases                                                     | 50.60/4.4/100/303          | S47                   |
| TCPF <sup>al</sup>                                                                | 52.63/6.0/50/301           | S48                   |
| 4-aminoantipyrine immobilized bentonite                                           | 52.90/4.0/1/298            | S49                   |
| CNTs/Fe <sub>3</sub> O <sub>4</sub> <sup>am</sup>                                 | 65.52/6.5/50/298           | S50                   |
| dithiocarbamate-anchored polymer/organosmectite<br>composites                     | 71.10/7.0/50/293           | S51                   |
| graphene-MWCNT <sup>l</sup>                                                       | 75.80/–/50/298             | S52                   |
| PANIPN41 <sup>w</sup>                                                             | 78.44/7.0/30/303           | S24                   |
| Si-DTC <sup>an</sup>                                                              | 80.24/6.0/200/298          | S53                   |
| MWCNTs <sup>l</sup>                                                               | 84.66/6.0/400/298          | S54                   |
| graphene/ <i>c</i> -MWCNT <sup>l</sup>                                            | 93.30/–/50/298             | S52                   |
| PANIPN21 <sup>i</sup>                                                             | 96.78/7.0/30/303           | S24                   |
| CSTU <sup>ao</sup>                                                                | 135.00/5.0/100/303         | S55                   |
| dithizone-anchored poly(vinyl pyridine)                                           | 144.40/3.0/1000/–          | S56                   |
| 3-trimethoxysilyl-1-propanethiol immobilized on<br>silica                         | 186.50/6.0/–/298           | S57                   |
| PAM/ATP <sup>ap</sup>                                                             | 192.50/7.0/100–900/303     | S58                   |
| bayberry tannin-immobilized collagen fiber                                        | 198.49/7.0/200/303         | S59                   |
| polypyrrole-rGO <sup>y</sup>                                                      | 980.00/3.0/50–250/298      | S60                   |
| PANI-rGO <sup>aq</sup>                                                            | 1000.00/4.0/10–40/305      | S61                   |
| pullulan-graft-polyacrylamide semi-IPN hydrogel                                   | 1724.47/6.1/100/292        | S62                   |
| GGTI- <i>g</i> -TetraP1 <sup>ar</sup>                                             | 1759.50/7.0/500–1000/293   | S63                   |
| GGTI- <i>g</i> -TetraP2 <sup>as</sup>                                             | 1848.03/7.0/500–1000/293   | S63                   |
| <b>NRCBD</b>                                                                      | <b>166.46/7.0/5–40/303</b> | <b>TS<sup>^</sup></b> |

<sup>a</sup>copolymer of acrylic acid, hydroxyl ethyl methacrylate (HEMA) and sodium carboxy methyl cellulose (CMC), <sup>b</sup>copolymer of sodium acrylate and CMC, <sup>c</sup>copolymer of acrylic acid and CMC, <sup>d</sup>sodium dodecyl sulfate (SDS) modified maghemite nanoparticles, <sup>e</sup>*N*-isopropylacrylamide-*co*-itaconic acid, <sup>f</sup>*co*-polymer of acrylamide and itaconic acid sodium salt in the presence of montmorillonite, <sup>g</sup>acrylamide-2-acrylamide-2-methylpropanesulfonic acid sodium salt hydrogel, <sup>h</sup>natural rubber (NR) and cow buffing dust (CBD) based scalable biocomposite, <sup>i</sup>activated carbon, <sup>j</sup>sea buckthornbranch powder, <sup>k</sup>copper nanowires loaded on activated carbon, <sup>l</sup>multiwalled carbon nanotube, <sup>m</sup>nickel sulfide nanoparticle-loaded activated carbon, <sup>n</sup>Au loaded on activated carbon, <sup>o</sup>copper oxide nanoparticles, <sup>p</sup>polydopamine coated sea buckthornbranch powder, <sup>q</sup>hexadecyltrimethylammonium bromide, <sup>r</sup>ZnO nanorod-loaded activated carbon, <sup>s</sup>Al-Mont-EnPILC, <sup>t</sup>cadmium hydroxide nanowire loaded on activated carbon, <sup>u</sup>sodium dodecyl sulphate/red mud, <sup>v</sup>pectin-*g*-(TerP21), <sup>w</sup>pectin-*g*-(TerP41), <sup>x</sup>MgO decked multi-layered graphene, <sup>y</sup>ethylene diamine modified magnetic polymethylmethacrylate microbeads, <sup>z</sup>reduced graphene oxide, <sup>aa</sup>attapulgit, <sup>ab</sup>poly(acrylic acid/acrylamide), <sup>ac</sup>Ti(IV) iodovanadate cation exchanger, <sup>ad</sup>hydroxyethylmethacrylate, <sup>ae</sup>silica microspheres, <sup>af</sup>methyl methacrylate-glycidyl methacrylate-divinylbenzene terpolymer beads, <sup>ag</sup>chitosan-poly(vinyl alcohol), <sup>ah</sup>poly(methyl methacrylate-methacryloylamidoglutamic acid), <sup>ai</sup>bis(triethoxysilylpropyl) tetrasulfide silica microspheres, <sup>aj</sup>guar gum-*g*-(acrylamide-*co*-sodium acrylate-*co*-acrylamidosodium propanoate)18, <sup>ak</sup>guar gum-*g*-(acrylamide-*co*-sodium acrylate-*co*-acrylamidosodium propanoate)14, <sup>al</sup>thiocarbonylhydrazide cross-linked chitosan-poly(vinyl alcohol) framework, <sup>am</sup>carbon nanotube/magnetite nanocomposites, <sup>an</sup>silica-supported dithiocarbamate adsorbent, <sup>ao</sup>cross-linked magnetic chitosan-phenylthiourea, <sup>ap</sup>polyacrylamide/attapulgit, <sup>aq</sup>polyaniline and rGO, <sup>ar</sup>gum ghatti (GGTI)-*g*-[sodium acrylate (SA)-*co*-4-(acrylamido)-4-methyl pentanoate (AMP)-*co*-3-(*N*-(4-(4-methyl pentanoate)) acrylamido) propanoate (NMPAP)-*co*-*N*-isopropylacrylamide (NIPA)]1, <sup>as</sup>gum ghatti (GGTI)-*g*-[sodium acrylate (SA)-*co*-4-(acrylamido)-4-methyl pentanoate (AMP)-*co*-3-(*N*-(4-(4-methyl pentanoate)) acrylamido) propanoate (NMPAP)-*co*-*N*-isopropylacrylamide (NIPA)]2, and <sup>^</sup>this study.

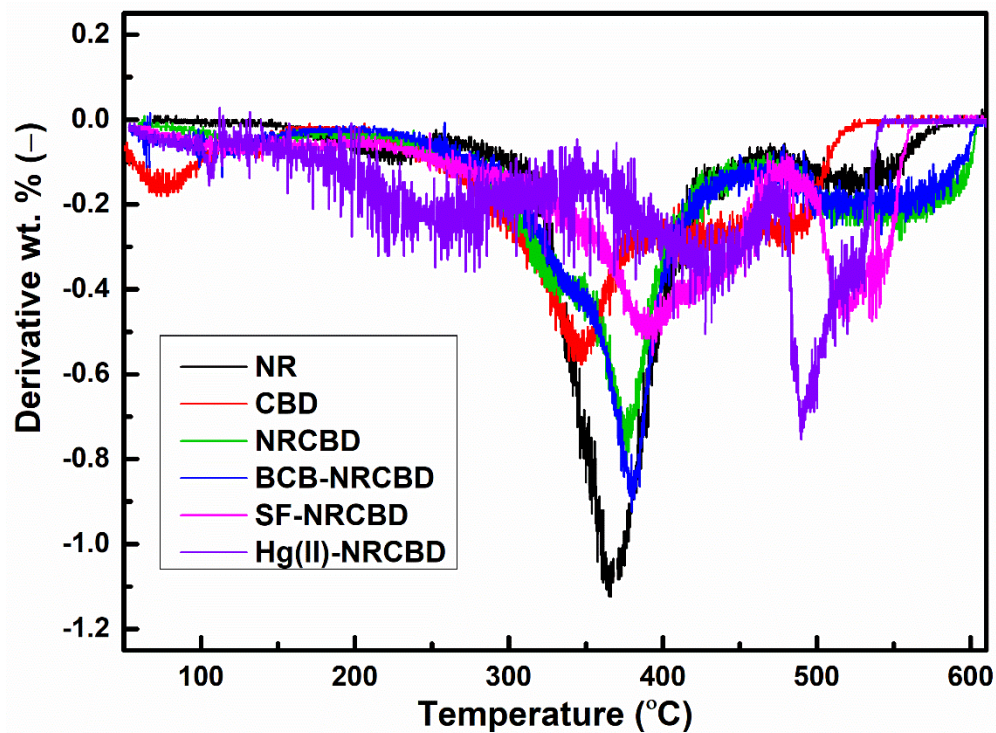

Figure S1. DTG of NR, CBD, NRCBD, BCB-, SF-, and Hg(II)-NRCBD

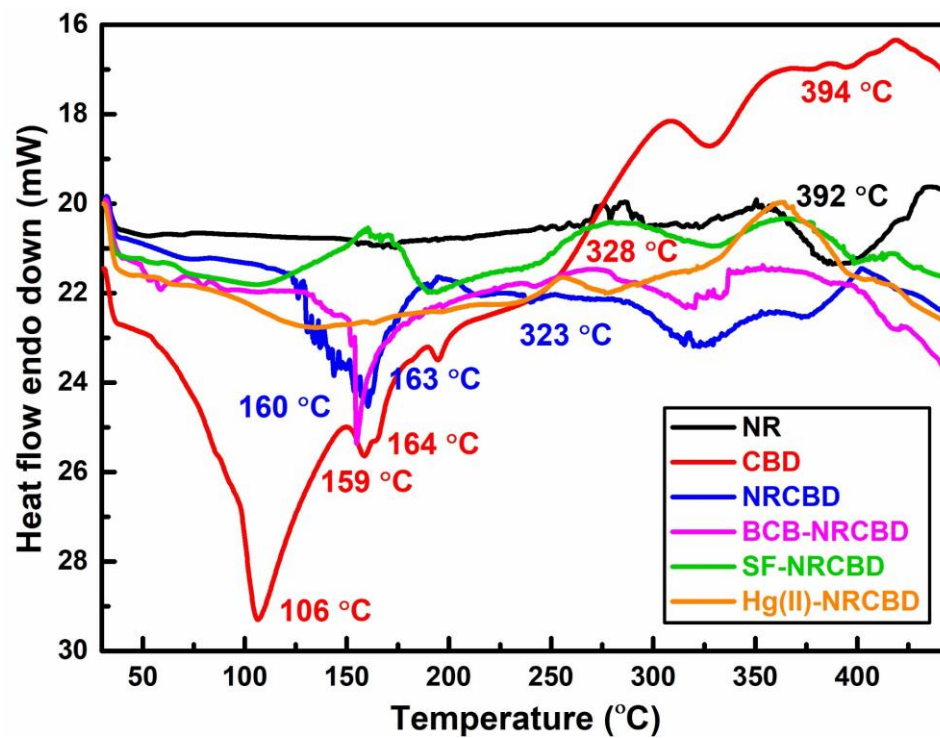

Figure S2. DSC of NR, CBD, NRCBD, BCB-, SF-, and Hg(II)-NRCBD

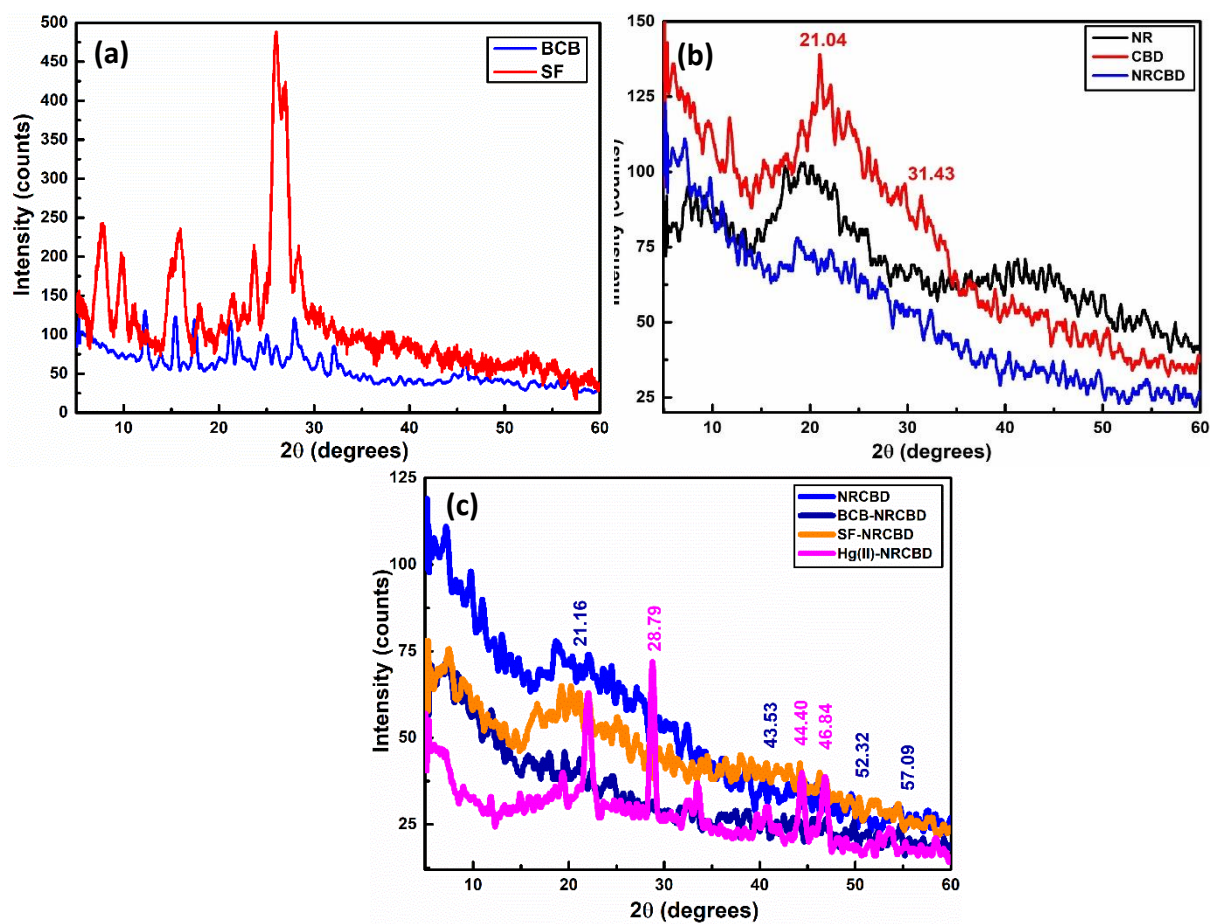

**Figure S3.** XRD of (a) SF and BCB, (b) NR, CBD, and NRCBD, and (c) NRCBD, BCB-, SF-, and Hg(II)-NRCBD

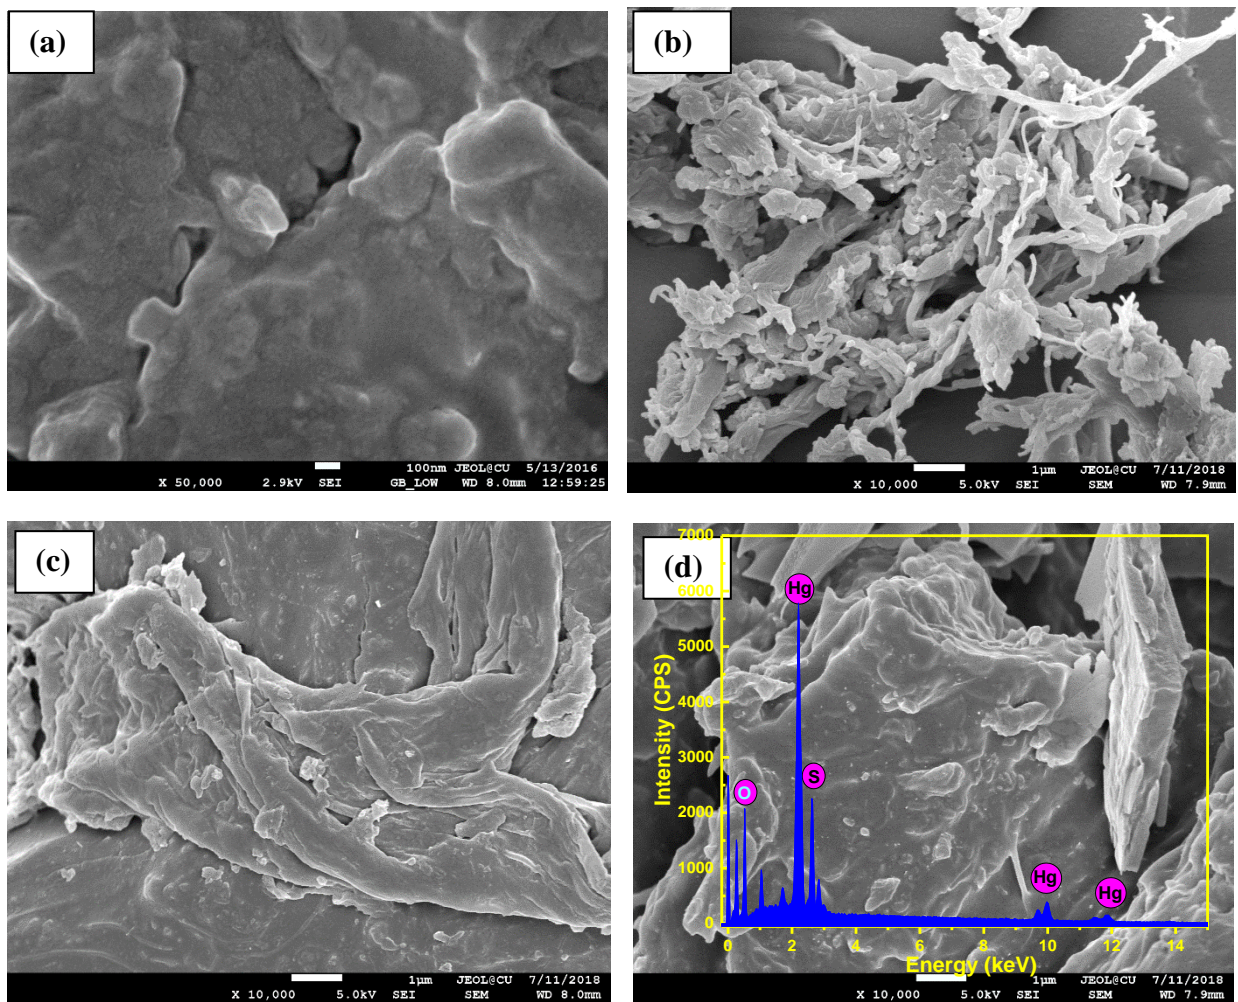

**Figure S4.** FESEM photomicrographs of (a) NR, (b) CBD, (c) NRCBD, and (d) Hg(II)-NRCBD; (inset of d) EDX of Hg(II)-NRCBD

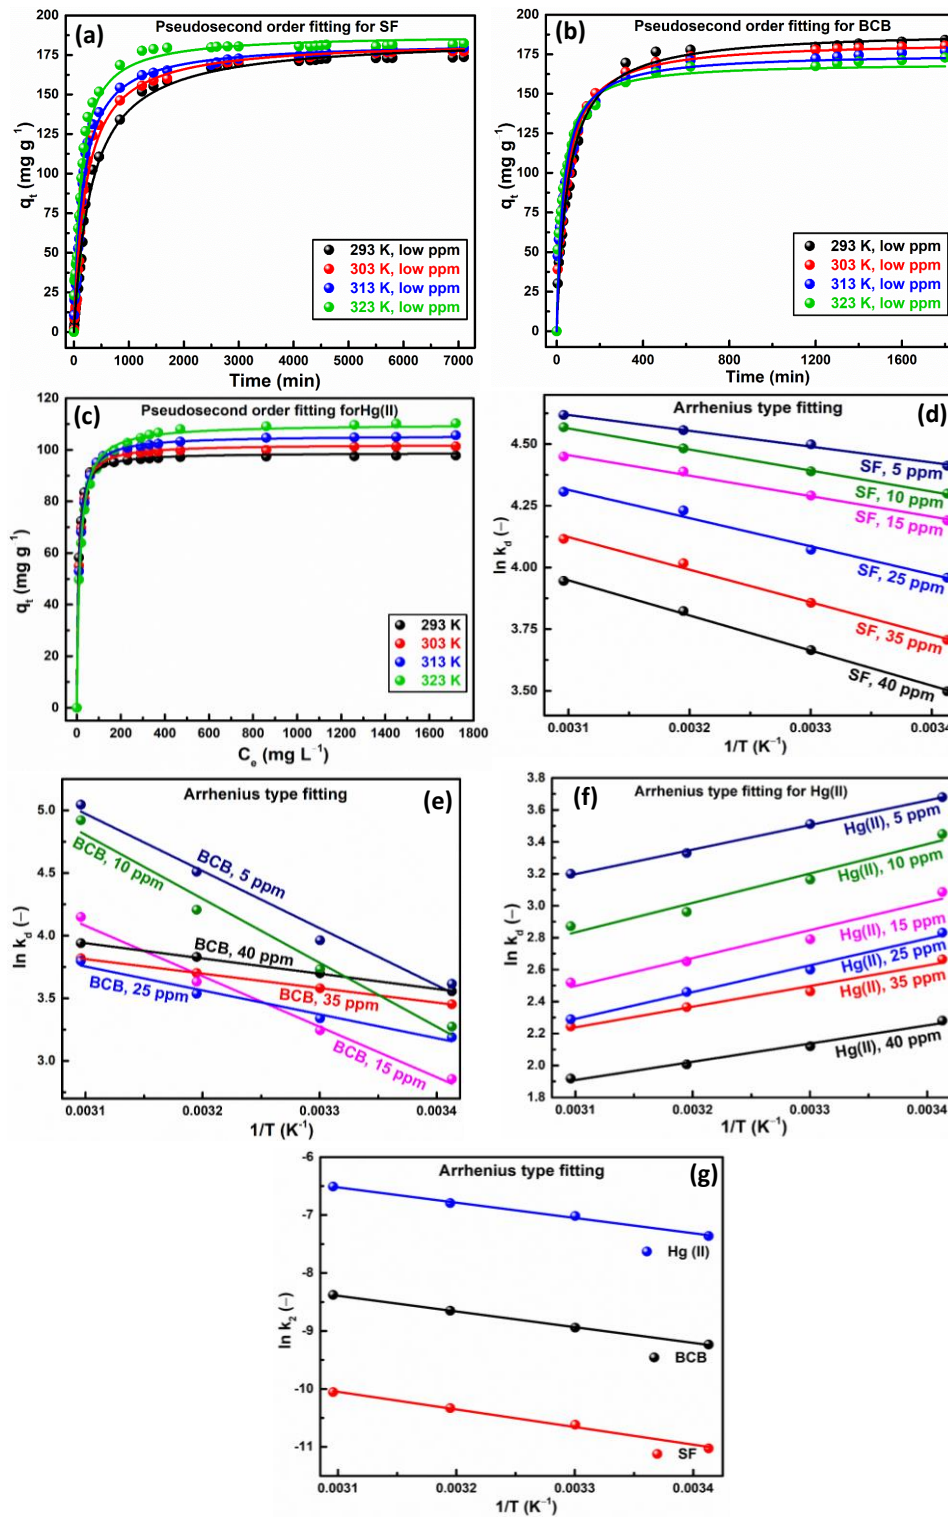

**Figure S5.** Pseudosecond order fitting of (a) SF-, (b) BCB-, and (c) Hg(II)-NRCBD; Arrhenius type fitting for (d) SF-, (e) BCB-, and (f) Hg(II)-NRCBD and (g) SF-/BCB-, Hg(II)-NRCBD

## References

- (S1) Steiner, T.; Saenger, W. Geometry of C–H...O Hydrogen Bonds in Carbohydrate Crystal Structures. Analysis of Neutron Diffraction Data. *J. Am. Chem. Soc.* **1992**, *114*, 10146–10154.
- (S2) Güçlü, G. Removal of Basic Dyes from Aqueous Solutions by Dimethyl Terephthalate Distillation Residue. *Desalination* **2010**, *259*, 53–58
- (S3) Banuylim, T.; Güçlü, G. Removal of Basic Dyes from Aqueous Solutions using Natural Clay. *Desalination* **2009**, *249*, 1377–1379.
- (S4) Mandal, B.; Ray, S. K. Removal of Safranin T and Brilliant Cresyl Blue Dyes from Water by Carboxymethyl Cellulose Incorporated Acrylic Hydrogels: Isotherms, Kinetics and Thermodynamic Study. *J. Taiwan Inst. Chem. E.* **2016**, *60*, 313–327.
- (S5) İyim, T. B.; Acar, I.; Özgümüş, S. Removal of Basic Dyes from Aqueous Solutions with Sulfonated Phenol-Formaldehyde Resin. *J. Appl. Polym. Sci.* **2008**, *109*, 2774–2780.
- (S6) Afkhami, A.; Saber-Tehrani, M.; Bagheri, H. Modified Maghemite Nanoparticles as An Efficient Adsorbent for Removing Some Cationic Dyes from Aqueous Solution. *Desalination* **2010**, *263*, 240–248.
- (S7) Özkahraman, B.; Acar, I.; Emik, S. Removal of Cationic Dyes from Aqueous Solutions with Poly (*N*-Isopropylacrylamide-*co*-Itaconic Acid) Hydrogels. *Polym. Bull.* **2011**, *66*, 551–570.
- (S8) Kaplan, M.; Kasgoz, H. Hydrogel Nanocomposite Sorbents for Removal of Basic Dyes. *Polym. Bull.* **2011**, *67*, 1153–1168.
- (S9) Kaşgöz, H.; Durmus, A. Dye Removal by A Novel Hydrogel-Clay Nanocomposite with Enhanced Swelling Properties. *Polym. Adv. Technol.* **2008**, *19*, 838–845.
- (S10) Ghaedi, M.; Haghdoost, S.; Nasiri Kokhdan, S.; Mihandoost, A.; Sahraie, R.; Daneshfar, A. Comparison of Activated Carbon, Multiwalled Carbon Nanotubes, and Cadmium Hydroxide Nanowire Loaded on Activated Carbon as Adsorbents for Kinetic and Equilibrium Study of Removal of Safranin O. *Spectrosc. Lett.* **2012**, *45*, 500–510.
- (S11) Sahu, M. K.; Sahu, U. K.; Patel, R. K. Adsorption of Safranin-O Dye on CO<sub>2</sub> Neutralized Activated Red Mud Waste: Process Modelling, Analysis and Optimization using Statistical Design. *RSC Adv.* **2015**, *5*, 42294–42304.
- (S12) Xu, X.; Bai, B.; Wang, H.; Suo, Y. Enhanced Adsorptive Removal of Safranin T from Aqueous Solutions by Waste Sea Buckthorn Branch Powder Modified with Dopamine: Kinetics, Equilibrium, and Thermodynamics. *J. Phys. Chem. Solids* **2015**, *87*, 23–31.
- (S13) Nasiri Azad, F.; Ghaedi, M.; Dashtian, K.; Hajati, S.; Goudarzi, A.; Jamshidi, M. Enhanced Simultaneous Removal of Malachite Green and Safranin O by ZnO Nanorod-Loaded Activated Carbon: Modeling, Optimization and Adsorption Isotherms. *New J. Chem.* **2015**, *39*, 7998–8005.
- (S14) Mohammed, M. A.; Ibrahim, A.; Shitu, A. Batch Removal of Hazardous Safranin-O in Wastewater using Pineapple Peels as an Agricultural Waste Based Adsorbent. *Int. J. Environ. Monit. Anal.* **2014**, *2*, 128–133.
- (S15) Roosta, M.; Ghaedia, M.; Asfaram, A. Simultaneous Ultrasonic-Assisted Removal of Malachite Green and Safranin O by Copper Nanowires Loaded on Activated Carbon: Central Composite Design Optimization. *RSC Adv.* **2015**, *5*, 57021–57029.
- (S16) Chowdhury, S.; Mishra, R.; Kushwaha, P.; Saha, P. Removal of Safranin from Aqueous Solutions by NaOH-Treated Rice Husk: Thermodynamics, Kinetics and Isothermic Heat of Adsorption. *Asia-Pac. J. Chem. Eng.* **2012**, *7*, 236–249.
- (S17) Ghaedi, M.; Pakniat, M.; Mahmoudi, Z.; Hajati, S.; Sahraei, R.; Daneshfar, A. Synthesis of Nickel Sulfide Nanoparticles Loaded on Activated Carbon as a Novel Adsorbent for the Competitive Removal of Methylene Blue and Safranin-O. *Spectrochim. Acta A* **2014**, *123*, 402–409.

- (S18) Roosta, M.; Ghaedi, M.; Daneshfar, A.; Sahraei, R. Experimental Design Based Response Surface Methodology Optimization of Ultrasonic Assisted Adsorption of Safaranin O by Tin Sulfide Nanoparticle Loaded on Activated Carbon. *Spectrochim. Acta A* **2014**, *122*, 223–231.
- (S19) Wahab, R.; Khan, F.; Kaushik, N. K.; Musarrat, J.; Al-Khedhairi, A. A. Photocatalytic TMO-NMs Adsorbent: Temperature-Time Dependent Safranin Degradation, Sorption Study Validated under Optimized Effective Equilibrium Models Parameter with Standardized Statistical Analysis. *Sci. Rep.* **2017**, *7*, 1–15.
- (S20) Guler, U. A.; Ersan, M.; Tuncel, E.; Düğenci, F. Mono and Simultaneous Removal of Crystal Violet and Safranin Dyes from Aqueous Solutions by HDTMA-Modified *Spirulina* sp. *Process Saf. Environ.* **2016**, *99*, 194–206.
- (S21) Zhao, X.; Wang, K.; Gao, Z.; Gao, H.; Xie, Z.; Du, X.; Huang, H. Reversing the Dyes Adsorption and Separation Performance of Metal-Organic Frameworks *via* Introduction of  $-SO_3H$  Groups. *Ind. Eng. Chem. Res.* **2017**, *56*, 4496–4501.
- (S22) Tovar-Gómez, R.; Rivera-Ramírez, D. A.; Hernández-Montoya, V.; Bonilla-Petriciolet, A.; Durán-Valle, C. J.; Montes-Morán, M. A. Synergic Adsorption in the Simultaneous Removal of Acid Blue 25 and Heavy Metals from Water using a  $Ca(PO_3)_2$ -Modified Carbon. *J. Hazard. Mater.* **2012**, *199–200*, 290–300.
- (S23) Sahu, M. K.; Patel, R. K. Removal of Safranin-O Dye 1 from Aqueous Solution using Modified Red Mud: Kinetic and Equilibrium Studies. *RSC Adv.* **2015**, *5*, 78491–78501.
- (S24) Singha, N. R.; Mahapatra, M.; Karmakar, M.; Mondal, H.; Dutta, A.; Deb, M.; Mitra, M.; Roy, C.; Chattopadhyay, P. K.; Maiti, D. K. In Situ Allocation of a Monomer in Pectin-*g*-Terpolymer Hydrogels and Effect of Comonomer Compositions on Superadsorption of Metal Ions/Dyes. *ACS Omega* **2018**, *3*, 4163–4180.
- (S25) Rotte, N. K.; Yerramala, S.; Boniface, J.; Srikanth, V. V. S. S. Equilibrium and Kinetics of Safranin O Dye Adsorption on MgO Decked Multi-Layered Graphene. *Chem. Eng. J.* **2014**, *258*, 412–419.
- (S26) Khalil, M. I.; Farag, S. Utilization of Some Starch Derivatives in Heavy Metal Ions Removal. *J. Appl. Polym. Sci.* **1998**, *69*, 45–50.
- (S27) Tang, X.; Niu, D.; Bi, C.; Shen, B.  $Hg^{2+}$  Adsorption from a Low-Concentration Aqueous Solution on Chitosan Beads Modified by Combining Polyamination with  $Hg^{2+}$ -Imprinted Technologies. *Ind. Eng. Chem. Res.* **2013**, *52*, 13120–13127.
- (S28) Denizli, A.; Ozkan, G.; Arica, M. Y. Preparation and Characterization of Magnetic Polymethylmethacrylate Microbeads Carrying Ethylene Diamine for Removal of Cu(II), Cd(II), Pb(II), and Hg(II) from Aqueous Solutions. *J. App. Polym. Sci.* **2000**, *78*, 81–89.
- (S29) Sreepasad, T. S.; Maliyekkal, S. M.; Lisha, K. P.; Pradeep, T. Reduced Graphene Oxide-Metal/Metal Oxide Composites: Facile Synthesis and Application in Water Purification. *J. Hazard. Mater.* **2011**, *186*, 921–931.
- (S30) Wang, X.; Wang, A. Adsorption Characteristics of Chitosan-*g*-Poly(Acrylic Acid)/Attapulgitte Hydrogel Composite for Hg(II) Ions from Aqueous Solution. *Separ. Sci. Technol.* **2010**, *45*, 2086–2094.
- (S31) Deshkar, A. M.; Bokade, S. S.; Dara, S. S. Modified *Hardwickia Binata* Bark for Adsorption of Mercury (II) from Water. *Water Res.* **1990**, *24*, 1011–1016.
- (S32) Vieira, R. S.; Beppu, M. M. Dynamic and Static Adsorption and Desorption of Hg(II) Ions on Chitosan Membranes and Spheres. *Water Res.* **2006**, *40*, 1726–1734.
- (S33) Dong, J.; Xu, Z.; Wang, F. Engineering and Characterization of Mesoporous Silica-Coated Magnetic Particles for Mercury Removal from Industrial Effluents. *Appl. Surf. Sci.* **2008**, *254*, 3522–3530.
- (S34) Bingöl, D.; Saraydin, D.; Özbay, D. S. Full Factorial Design Approach to Hg(II) Adsorption onto Hydrogels. *Arab. J. Sci. Eng.* **2015**, *40*, 109–116.
- (S35) Naushad, M.; ALOthman, Z. A.; Awual, M. R.; Alam, M. M.; Eldesoky, G. E. Adsorption Kinetics, Isotherms, and Thermodynamic Studies for the Adsorption of  $Pb^{2+}$  and  $Hg^{2+}$  Metal Ions from Aqueous Medium Using Ti(IV) Iodovanadate Cation Exchanger. *Ionics* **2015**, *21*, 2237–2245.

- (S36) Genç, Ö.; Soysal, L.; Bayramoglu, G.; Arica, M. Y.; Bektas, S. Procion Green H-4G Immobilized Poly(Hydroxyethylmethacrylate/Chitosan) Composite Membranes for Heavy Metal Removal. *J. Hazard. Mater.*, **2003**, *97*, 111–125.
- (S37) Saman, N.; Johari, K.; Mat, H. Adsorption Characteristics of Sulfur-Functionalized Silica Microspheres with respect to the Removal of Hg(II) from Aqueous Solutions. *Ind. Eng. Chem. Res.* **2014**, *53*, 1225–1233.
- (S38) Bicak, N.; Sherrington, D. C.; Sungur, S.; Tan, N. A Glycidyl Methacrylate-Based Resin with Pendant Urea Groups as a High Capacity Mercury Specific Sorbent. *React. Funct. Polym.* **2003**, *54*, 141–147.
- (S39) Meena, A. K.; Kadirvelu, K.; Mishra, G. K.; Rajagopal, C.; Nagar, P. N. Adsorptive Removal of Heavy Metals from Aqueous Solution by Treated Sawdust (*Acacia arabica*). *J. Hazard. Mater.* **2008**, *150*, 604–611.
- (S40) Wang, C.; Tao, S.; Wei, W.; Meng, C.; Liu, F.; Han, M. Multifunctional Mesoporous Material for Detection, Adsorption and Removal of Hg<sup>2+</sup> in Aqueous Solution. *J. Mater. Chem.* **2010**, *20*, 4635–4641.
- (S41) Wang, X.; Yang, L.; Zhang, J.; Wang, C.; Li, Q. Preparation and Characterization of Chitosan-Poly(Vinyl Alcohol)/Bentonite Nanocomposites for Adsorption of Hg(II) Ions. *Chem. Eng. J.* **2014**, *251*, 404–412.
- (S42) Kacar, Y.; Arpa, C.; Tan, S.; Denizli, A.; Genc, O.; Arica, M. Y. Biosorption of Hg(II) and Cd(II) from Aqueous Solutions: Comparison of Biosorptive Capacity of Alginate and Immobilized Live and Heat Inactivated *Phanerochaete chrysosporium*. *Process Biochem.* **2002**, *37*, 601–610.
- (S43) Denizli, A.; Sanli, N.; Garipcan, B.; Patir, S.; Alsancak, G. Methacryloylamidoglutamic Acid Incorporated Porous Poly(Methylmethacrylate) Beads for Heavy-Metal Removal. *Ind. Eng. Chem. Res.* **2004**, *43*, 6095–6101.
- (S44) Vieira, R. S.; Beppu, M. M. Interaction of Natural and Crosslinked Chitosan Membranes with Hg(II) Ions. *Colloid. Surface. A* **2006**, *279*, 196–207.
- (S45) Jyo, A.; Matsufune, S.; Ono, H.; Egawa, H. Preparation of Phosphoric Acid Resins with Large Cation Exchange Capacities from Macroreticular Poly(Glycidyl Methacrylate-co-Divinylbenzene) Beads and their Behavior in Uptake of Metal Ions. *J. Appl. Polym. Sci.* **1997**, *63*, 1327–1334.
- (S46) Singha, N. R.; Dutta, A.; Mahapatra, M.; Karmakar, M.; Mondal, H.; Chattopadhyay, P. K.; Maiti, D. K. In Situ Allocation of a Monomer in Pectin-g-Terpolymer Hydrogels and Effect of Comonomer Compositions on Superadsorption of Metal Ions/Dyes. *ACS Omega* **2018**, *3*, 472–494.
- (S47) Kumari, S.; Chauhan, G. S. New Cellulose-Lysine Schiff-Base-Based Sensor-Adsorbent for Mercury Ions. *ACS Appl. Mater. Inter.* **2014**, *6*, 5908–5917.
- (S48) Ahmad, M.; Manzoor, K.; Chaudhuri, R. R.; Ikram, S. Thiocarbohydrazide Cross-Linked Oxidized Chitosan and Poly(Vinyl Alcohol): A Green Framework as Efficient Cu(II), Pb(II), and Hg(II) Adsorbent. *J. Chem. Eng. Data* **2017**, *62*, 2044–2055.
- (S49) Wang, Q.; Chang, X.; Li, D.; Hu, Z.; Li, R.; He, Q. Adsorption of Chromium(III), Mercury(II) and Lead(II) Ions onto 4-Aminoantipyrine Immobilized Bentonite. *J. Hazard. Mater.* **2011**, *186*, 1076–1081.
- (S50) Zhang, C.; Sui, J.; Li, J.; Tang, Y.; Cai, W. Efficient Removal of Heavy Metal Ions by Thiol-Functionalized Super Paramagnetic Carbon Nanotubes. *Chem. Eng. J.* **2012**, *210*, 45–52.
- (S51) Say, R.; Birlik, E.; Denizli, A.; Ersöz, A. Removal of Heavy Metal Ions by Dithiocarbamate-Anchored Polymer/Organosmectite Composites. *Appl. Clay Sci.* **2006**, *31*, 298–305.
- (S52) Sui, Z.; Meng, Q.; Zhang, X.; Ma, R.; Cao, B. Green Synthesis of Carbon Nanotube–Graphene Hybrid Aerogels and their Use as Versatile Agents for Water Purification. *J. Mater. Chem.* **2012**, *22*, 8767–8771.
- (S53) Bai, L.; Hu, H. P.; Fu, W.; Wan, J.; Cheng, X.; Zhuge, L.; Xiong, L.; Chen, Q. Synthesis of a Novel Silica-Supported Dithiocarbamate Adsorbent and its Properties for the Removal of Heavy Metal Ions. *J. Hazard. Mater.* **2011**, *195*, 261–275.



- (S54) Hadavifar, M.; Bahramifar, N.; Younesi, H.; Li, Q. Adsorption of Mercury Ions from Synthetic and Real Wastewater Aqueous Solution by Functionalized Multi-Walled Carbon Nanotube with Both Amino and Thiolated Groups. *Chem. Eng. J.* **2014**, *237*, 217–228.
- (S55) Monier, M.; Abdel-Latif, D. A. Preparation of Cross-Linked Magnetic Chitosan-Phenylthiourea Resin for Adsorption of Hg(II), Cd(II) and Zn(II) Ions from Aqueous Solutions. *J. Hazard. Mater.* **2012**, *209–210*, 240–249.
- (S56) Shah, R.; Devi, S. Preconcentration of Mercury(II) on Dithizone Anchored Poly(Vinyl Pyridine) Support. *React. Funct. Polym.* **1996**, *31*, 1–9.
- (S57) Cestari, A. R.; Airoidi, C. Chemisorption on Thiol-Silicas: Divalent Cations as a Function of pH and Primary Amines on Thiol-Mercury Adsorbed. *J. Colloid Interface Sci.* **1997**, *195*, 338–342.
- (S58) Zhao, Y.; Chen, Y.; Li, M.; Zhou, S.; Xue, A.; Xing, W. Adsorption of Hg<sup>2+</sup> from Aqueous Solution onto Polyacrylamide/Attapulgate. *J. Hazard. Mater.* **2009**, *171*, 640–646.
- (S59) Huang, X.; Liao, X.; Shi, B. Hg(II) Removal from Aqueous Solution by Bayberry Tannin-Immobilized Collagen Fiber. *J. Hazard. Mater.* **2009**, *170*, 1141–1148.
- (S60) Chandra, V.; Kim, K. S. Highly Selective Adsorption of Hg<sup>2+</sup> by a Polypyrrole-Reduced Graphene Oxide Composite. *Chem. Commun.* **2011**, *47*, 3942–3944.
- (S61) Li, R.; Liu, L.; Yang, F. Preparation of Polyaniline/Reduced Graphene Oxide Nanocomposite and its Application in Adsorption of Aqueous Hg(II). *Chem. Eng. J.* **2013**, *229*, 460–468.
- (S62) Saber-Samandari, S.; Gazi, M. Pullulan Based Porous Semi-IPN Hydrogel: Synthesis, Characterization and its Application in the Removal of Mercury from Aqueous Solution. *J. Taiwan. Inst. Chem. Eng.* **2015**, *51*, 143–151.
- (S63) Mondal, H.; Karmakar, M.; Dutta, A.; Mahapatra, M.; Deb, M.; Mitra, M.; Roy, J. S. D.; Roy, C.; Chattopadhyay, P. K.; Singha, N. R. Tetrapolymer Network Hydrogels via Gum Ghatti-Grafted and N-H/C-H-Activated Allocation of Monomers for Composition-Dependent Superadsorption of Metal Ions. *ACS Omega* **2018**, *3*, 10692–10708.
